# Supplementary material for: Exploring the antimicrobial potential of chitosan nanoparticles: synthesis, characterization and impact on Pseudomonas aeruginosa virulence factors
Source: Royal Society of Chemistry journal article supplement (doi:10.1039/d4na00064a), 2024-01-01
Supplement: d4na00064a1.pdf [file d4na00064a1.pdf]

### Supporting information

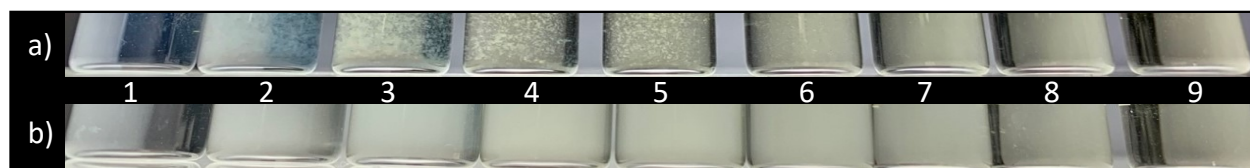

Figure S1 Solution of chitosan nanoparticles in LB culture media a) CS-NPs in acetate buffer; b) TMC-NPs in UPW; 1 stock solution of nanoparticles; 2 → 8 decreasing concentration of nanoparticles in LB culture media; nanoparticles-free LB culture media.
